# Supplementary material
Source: PubMed Central journal article supplement (PMC9211406)
Supplement: 10.1182-blood-2011-06-359448_zh6057-sup-document1.pdf [file 10.1182-blood-2011-06-359448_zh6057-sup-document1.pdf]

**Figure S1. Genotypes of mice.** Tail tips were collected from mice 3 weeks post-natally for genomic DNA extraction. Genotypes of all mice were examined by PCR assay using primers listed in (A) to detect the positivity or negativity for the *Cre* gene, *WT* and *fx* (floxed) alleles of the *Tak1* gene, *WT* and mutant alleles of *Tnfr1*, *Tnfr2* and *Fas* genes in all DNA samples. The gel pictures in (B) are examples of genotype data for *Tak1<sup>-/-</sup>Tnfr1<sup>-/-</sup>r2<sup>-/-</sup>* and *Tak1<sup>-/-</sup>Fas<sup>-/-</sup>* compound-mutant mice. C. BM MNCs were collected from *Tak1<sup>-/-</sup>Tnfr1<sup>-/-</sup>* mice on day 7 after polyI:C injection and seeded for CFU assay. The colonies were picked up individually for DNA extraction on day 10 of culturing. PCR was performed using primers TAK1 and 2 for *Fx* allele, and primers TAK3 and 4 for mutant allele. Lines 1 to 30 represent 30 different colony samples. Lines 31 and 32 are positive and negative controls, respectively.

**Figure S2. Hematopoietic cell infiltration of liver in *Tak1<sup>-/-</sup>Tnfr1<sup>-/-</sup>r2<sup>-/-</sup>* mice.** Liver tissues were collected from *Tak1<sup>-/-</sup>Tnfr1<sup>-/-</sup>r2<sup>-/-</sup>* mice 20 days after polyI:C injection. H & E staining (A) or TUNEL staining (B) of liver tissues from *Tak1<sup>-/-</sup>Tnfr1<sup>-/-</sup>r2<sup>-/-</sup>* mice compared with *Tak1<sup>-/-</sup>* mice (8 days after polyI:C injection) and WT controls. Bar in figure is 100µm in length. C. Number of TUNEL-positive cells in each field of 400× microscopy was counted. Data in C are averages of 10 fields for each sample.

**Figure S3. A. Colony forming ability of *Tnfr1<sup>-/-</sup>*, *Tnfr2<sup>-/-</sup>*, *Tnfr1<sup>-/-</sup>r2<sup>-/-</sup>* and *Fas<sup>-/-</sup>* HSPCs are comparable to WT HSPCs.** *c-kit<sup>+</sup>* HSPCs were isolated from *Tak1<sup>fx/fx</sup>*, *Tak1<sup>fx/fx</sup>Tnfr1<sup>-/-</sup>*, *Tak1<sup>fx/fx</sup>Tnfr2<sup>-/-</sup>*, *Tak1<sup>fx/fx</sup>Tnfr1<sup>-/-</sup>r2<sup>-/-</sup>* and *Tak1<sup>fx/fx</sup>Tnfr2<sup>-/-</sup>* mice and infected with MSCV-GFP virus. Infected cells were purified by FACS to sort for *GFP<sup>+</sup>* cells and seeded into methylcellulose medium for CFU assay. Exactly 30,000 *GFP<sup>+</sup>* cells were sorted from each sample and placed into three dishes. Colonies were counted on day 10 of culturing. We found that comparable numbers of CFUs were observed in all samples. B. *MSCV-Cre-GFP* infection did not affect the colony forming ability of *Tak1<sup>fx/+</sup>* HSPCs.

**Figure S4. Receptors for several inflammatory factors are expressed in HSPCs and their levels are increased in *Tak1<sup>-/-</sup>Tnfr1<sup>-/-</sup>* HSPCs.** A. BM MNCs were collected from WT mice and stained with lineage cocktail and *c-kit* antibodies, as well as antibodies specific to receptors for inflammatory factors. Levels of receptors for inflammatory factors were compared among HSPCs (*lin<sup>-</sup>c-Kit<sup>+</sup>*), CPs (*Lin<sup>low</sup>c-kit<sup>+</sup>*) and differentiated cells (*Lin<sup>+</sup>*). B. BM MNCs were collected from *Tnfr1<sup>-/-</sup>* and *Tak1<sup>-/-</sup>Tnfr1<sup>-/-</sup>* mice on day 7 after three polyI:C injections (on days 1, 3, & 5). Levels of receptors for inflammatory factors were examined in HSCs (*lin<sup>-</sup>Sca1<sup>+</sup>c-kit<sup>+</sup>*) and compared between the *Tnfr1<sup>-/-</sup>* and *Tak1<sup>-/-</sup>Tnfr1<sup>-/-</sup>* mice.

**Figure S5. TRAIL, IL-1β and IFN-α did not further enhance the death of *Tak1<sup>-/-</sup>Tnfr1<sup>-/-</sup>r2<sup>-/-</sup>* HSPCs.** *c-kit<sup>+</sup>* HSPCs were isolated from *Tak1<sup>fx/fx</sup>Tnfr1<sup>-/-</sup>r2<sup>-/-</sup>* mice. These cells were infected with MSCV-Cre-GFP virus to induce *Tak1* deletion and cultured in HSPC medium with or without addition of inflammatory cytokines. MSCV-GFP infection was studied in parallel as a control. Dashed line represents the normalized data for MSCV-GFP infected HSPCs. Ratios of *GFP<sup>+</sup>* cells (normalized against MSCV-GFP infection) were compared among different treatment groups.

**Figure S6. Type-II apoptosis in *Tak1<sup>-/-</sup>* HSPCs.** A-B. WT and *Tak1<sup>-/-</sup>Tnfr1<sup>-/-</sup>r2<sup>-/-</sup>* mice were injected with polyI:C on days 1 and 2 to induce *Tak1* deletion. BM MNCs were isolated on day 3 to analyze the mitochondrial membrane potential ( $\Delta\psi_m$ ) by JC-1 staining (A), as well as to examine the activity of caspases 9 and 3 by Western Blotting (B). C. *c-Kit<sup>+</sup>* HSPCs were isolated from *Tak1<sup>fx/fx</sup>Tnfr1<sup>-/-</sup>r2<sup>-/-</sup>* mice and co-infected with MSCV-Cre-YFP and MSCV- $\Delta$ -caspase-9-GFP virus. Infected cells were purified by FACS (*YFP<sup>+</sup>GFP<sup>+</sup>* for co-infection) and incubated in HSPC medium for 24 hours. Death of infected cells was analyzed by Annexin-V staining. MSCV-Cre-YFP and MSCV-GFP infections were studied in parallel as controls. \*\* indicates significantly reduced compared to Cre-only infection group.

**D & E.** c-kit<sup>+</sup> HSPCs were collected from *Tak1<sup>fx/fx</sup>* (**D**) and *Tak1<sup>fx/fx</sup>Tnfr1<sup>-/-</sup>r2<sup>-/-</sup>* (**E**) mice and infected with MSCV-Cre-YFP virus or co-infected with MSCV-Cre-YFP and MSCV-test gene-GFP virus. MSCV-GFP infection was studied in parallel as a control. Infected cells were purified by FACS and incubated in HSPC medium for 24 hours to analyze cell death by Annexin-V staining, or were seeded into methylcellulose medium for CFU assay. \* and \*\* indicate significant difference compared to Cre-only infected group (p<0.05 and 0.01, respectively). Data shown in this figure are representative of 3 independent experiments.

**Figure S7. ROS-induced cell death is not involved in apoptosis of HSPCs nor BMF in *Tak1<sup>-/-</sup>* mice.** **A.** ROS levels were examined in WT and *Tak1<sup>-/-</sup>* HSPCs using dichlorodihydrofluorescein diacetate (CM-H<sub>2</sub>DCFDA) staining followed by flow cytometric analysis. **B-C.** c-Kit<sup>+</sup> HSPCs were isolated from *Tak1<sup>fx/fx</sup>* and *Tak1<sup>fx/fx</sup>Tnfr1<sup>-/-</sup>r2<sup>-/-</sup>* mice. These cells were infected with MSCV-Cre-GFP retrovirus to induce *Tak1* deletion *in vitro*. MSCV-GFP infections were studied in parallel as controls. Infected cells were cultured in HSPC medium with or without addition of NAC (N-acetyl-cysteine) or BHA (butylated hydroxyanisole) for 4 days with daily medium changes. Percentages of GFP<sup>+</sup> cells were examined at the indicated time points. The ratios of GFP<sup>+</sup> cells of MSCV-Cre-GFP-infected groups were normalized against the ratio in the MSCV-GFP-infected group. Dashed line represents the normalized data of MSCV-GFP-infected HSPCs. The reduction in the ratio of GFP<sup>+</sup> cells reflects the apoptotic loss of infected cells (*Tak1*-deleted cells). NAC and BHA treatments were unable to prevent this reduction in *Tak1<sup>-/-</sup>* (**B**) and in *Tak1<sup>-/-</sup>Tnfr1<sup>-/-</sup>r2<sup>-/-</sup>* (**C**) HSPCs. **D & E.** c-Kit<sup>+</sup> HSPCs were isolated from *Tak1<sup>fx/fx</sup>* mice. These cells were co-infected with MSCV-Cre-YFP (to induce *Tak1* deletion) and *SOD* (superoxide dismutase)-GFP or *Tak1*-GFP virus (to over-express SOD or Tak1). Co-infected cells were purified 16 hours after infection by sorting GFP<sup>+</sup>YFP<sup>+</sup> cells and were seeded into methylcellulose medium for CFU analysis (**D**) or into HSPCs medium for apoptotic assay (**E**). MSCV-GFP and MSCV-Cre-YFP infections were studied in parallel as controls. *SOD* over-expression failed to prevent the apoptosis of *Tak1<sup>-/-</sup>* HSPCs. **F-I.** *Tak1<sup>-/-</sup>* mice were injected with polyI:C on days 1, 3 and 5 to induce *Tak1* deletion, and were also treated with NAC on days 0 to 8 to reduce ROS levels. WT and additional *Tak1<sup>-/-</sup>* mice were injected with polyI:C only or NAC only to serve as controls. Femurs and spleens of the mice were collected on day 8 after induction of *Tak1* gene deletion. H & E-stained BM sections from the indicated genotypes of mice with or without NAC treatment are shown (**F**). Numbers of total nucleated cells from two hind legs of each mouse were counted (**G**). Percentages (**H**) and absolute numbers (**I**) of HSCs and CPs were studied by flow cytometry. Data shown in **H & I** are an average of 5 mice from each genotype.

**Figure S8. Apoptosis of hepatocytes in *Tak1<sup>-/-</sup>* mice is substantially prevented by antioxidant treatment.** *Tak1<sup>-/-</sup>* and littermate control mice (1 month old) were injected 3 times with polyI:C to induce *Tak1* gene deletion. Three *Tak1<sup>-/-</sup>* mice were also injected with an antioxidant (NAC) every day beginning one day prior to the first polyI:C injection. Livers of these mice were collected on day 8 after the injections. **A.** H & E-stained liver sections from indicated genotypes of mice. **B.** Apoptosis in liver sections was examined by TUNEL staining and the number of TUNEL positive cells in each field of 400× microscopy was counted. Data in **C** are averages of 10 fields for each sample.

| A.          | Primers                          | Products      |
|-------------|----------------------------------|---------------|
| Cre Forward | TACCTGGAAAATGCTTCTGT             | 810bp         |
| Cre Reverse | TGATCTCCGGTATTGAAACT             |               |
| Tnfrsf1a-1  | GGATTGTCACGGTGCCGTTGAAG          | WT = 120 bp   |
| Tnfrsf1a-2  | TGACAAGGACACGGTGTGTGGC           | MUT = 155 bp  |
| Tnfrsf1a-3  | TGCTGATGGGGATACATCCATC           |               |
| Tnfrsf1a-4  | CCGGTGGATGTGGAATGTGTG            |               |
| Tnfrsf1b-1  | CCGGTGGATGTGGAATGTGTG            | MUT = 160 bp  |
| Tnfrsf1b-2  | AGAGCTCCAGGCACAAGGGC             | WT = 257 bp   |
| Tnfrsf1b-3  | AACGGGCCAGACCTCGGGT              |               |
| Fas-1       | TAGAAAGGTGCACGGGTGTG             | MUT=217 bp    |
| Fas-2       | GTAAATAATTGTGCTTCGTCAG           | WT=179 bp     |
| Fas-3       | CAAATCTAGGCATTAACAGTG            |               |
| TAK1        | GGCTTTCATTGTGGAGGTAAGCTGAGA      | flox 320bp    |
| TAK2        | GGAACCCGTGGATAAGTGCACTTGAAT      | WT 280bp      |
| TAK3        | GCAACTTCGACAACCTTGCCTTCCTGTG     | mutant 1000bp |
| TAK4        | GCACTTGAATTAGCGGCCGCAAGCTTATAACT |               |

B.

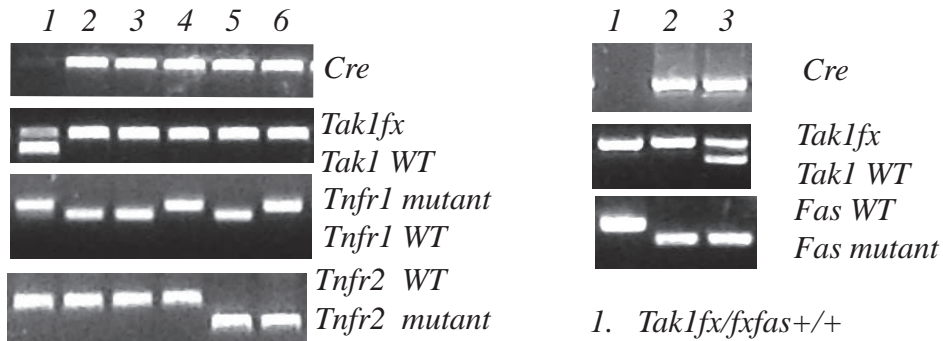

1. *Mx1Cre-Tak1fx/+Tnfr1-/-r2+/+*
  2. *Mx1Cre+Tak1fx/fxTnfr1+/+r2+/+*
  3. *Mx1Cre+Tak1fx/fxTnfr1+/+r2+/+*
  4. *Mx1Cre+Tak1fx/fxTnfr1-/-r2+/+*
  5. *Mx1Cre+Tak1fx/fxTnfr1+/+r2-/-*
  6. *Mx1Cre+Tak1fx/fxTnfr1-/-r2-/-*
1. *Tak1fx/fxfas+/+*
  2. *Mx1Cre+Tak1fx/fxFas-/-*
  3. *Mx1Cre+Tak1fx/+Fas-/-*

C.

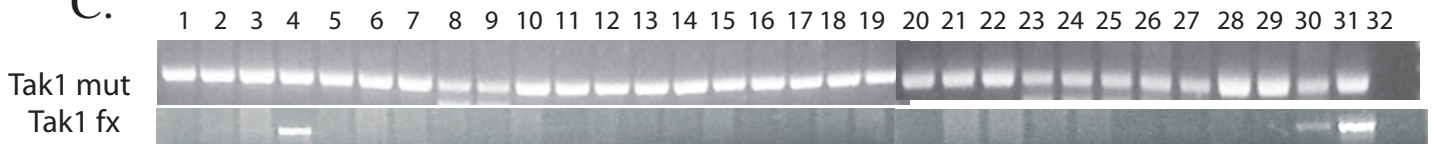

Figure S1

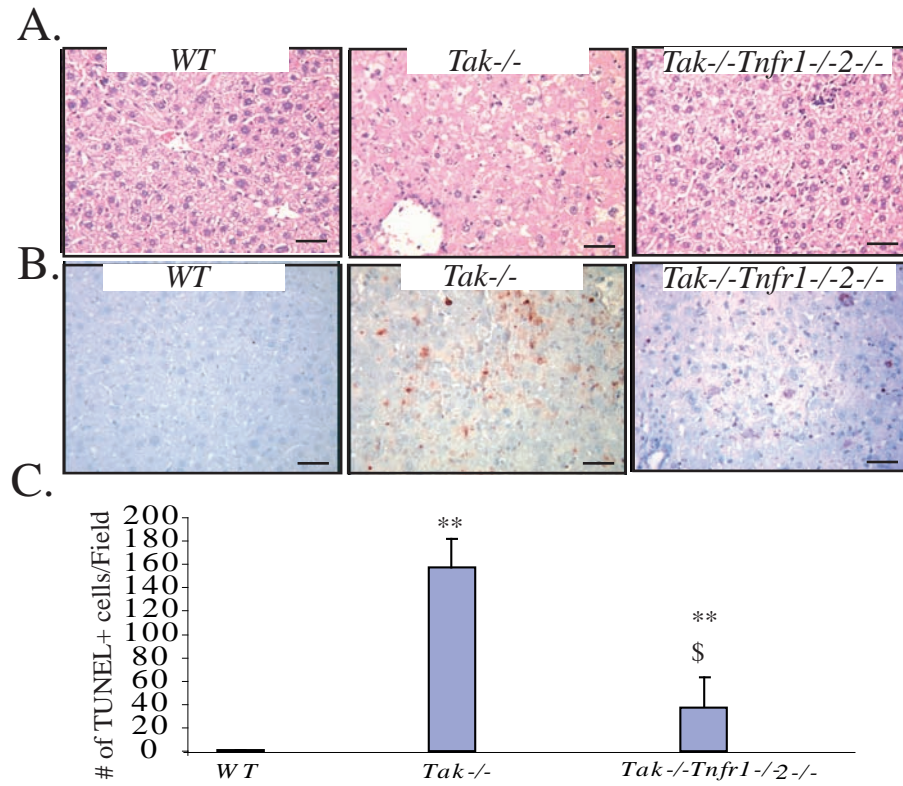

Figure S2

A.

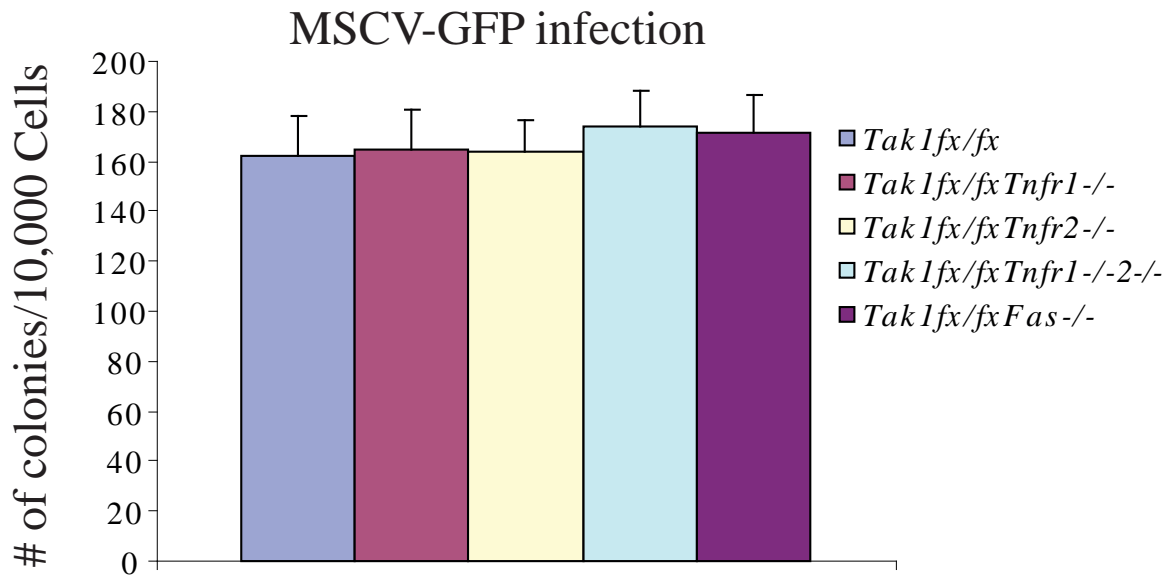

B.

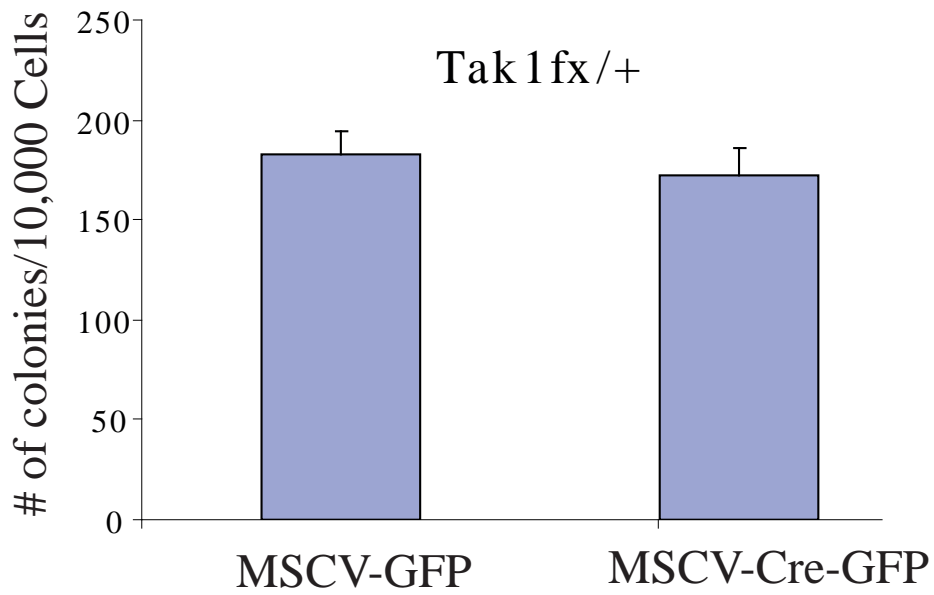

Figure S3

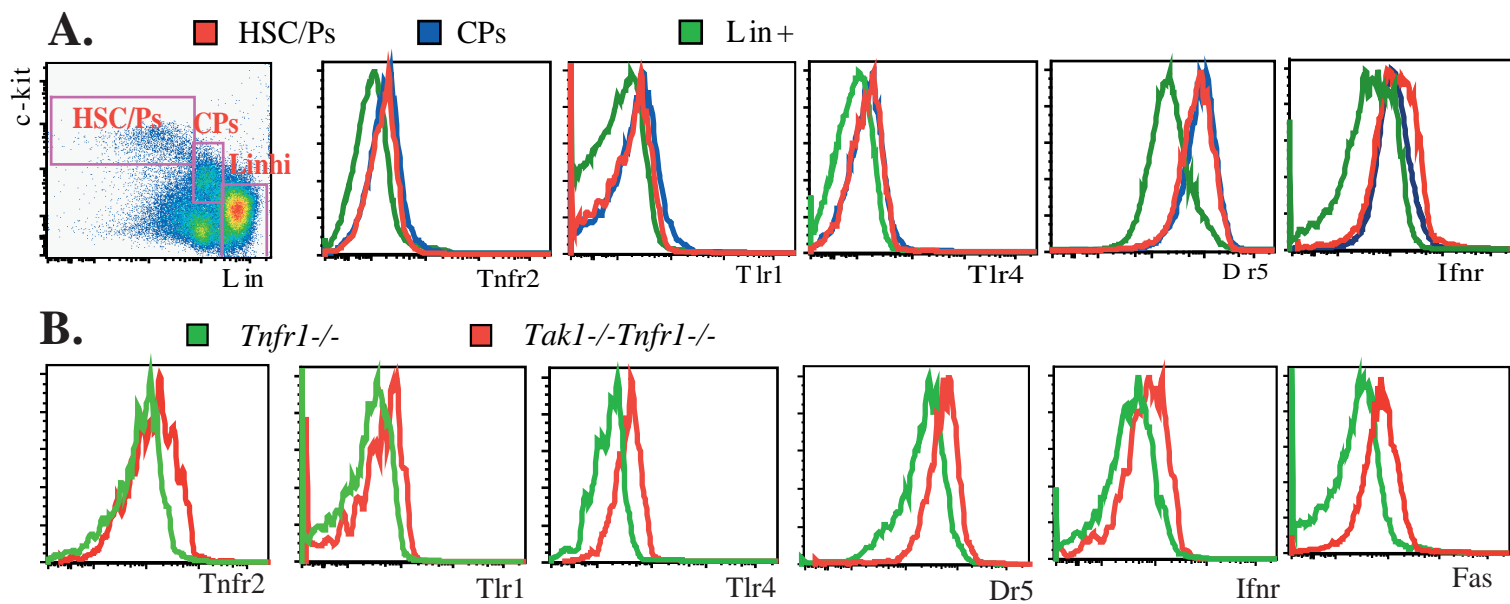

Figure S4

A.

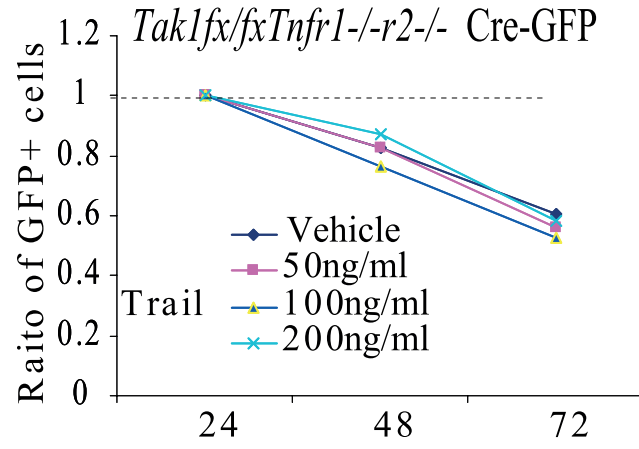

B.

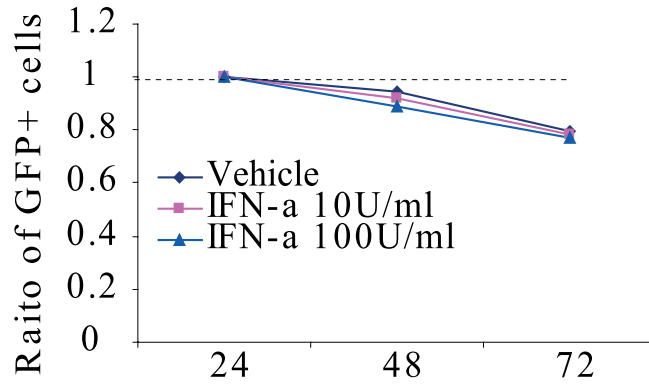

C.

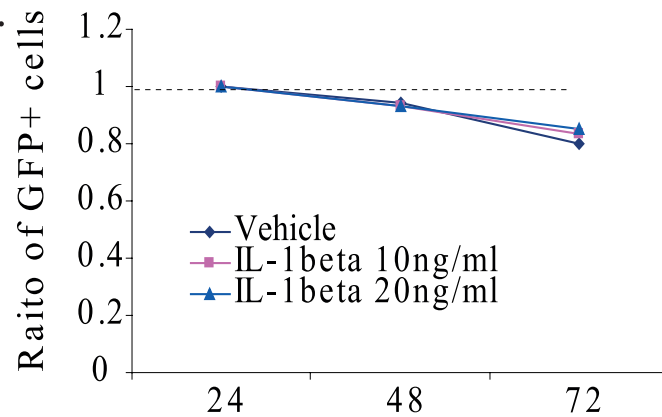

Figure S5

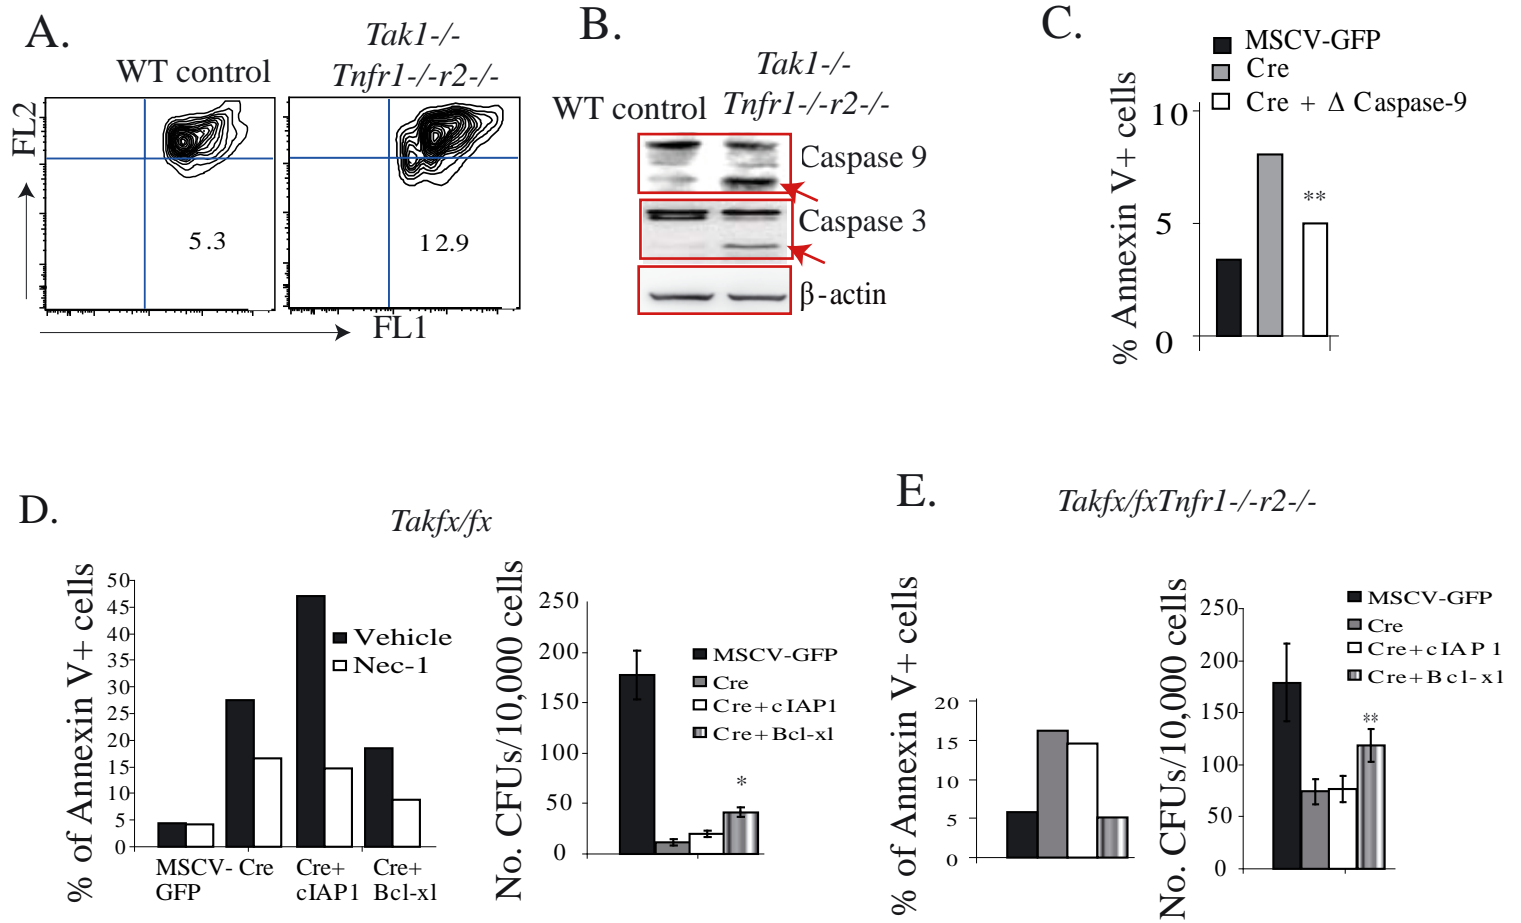

Figure S6



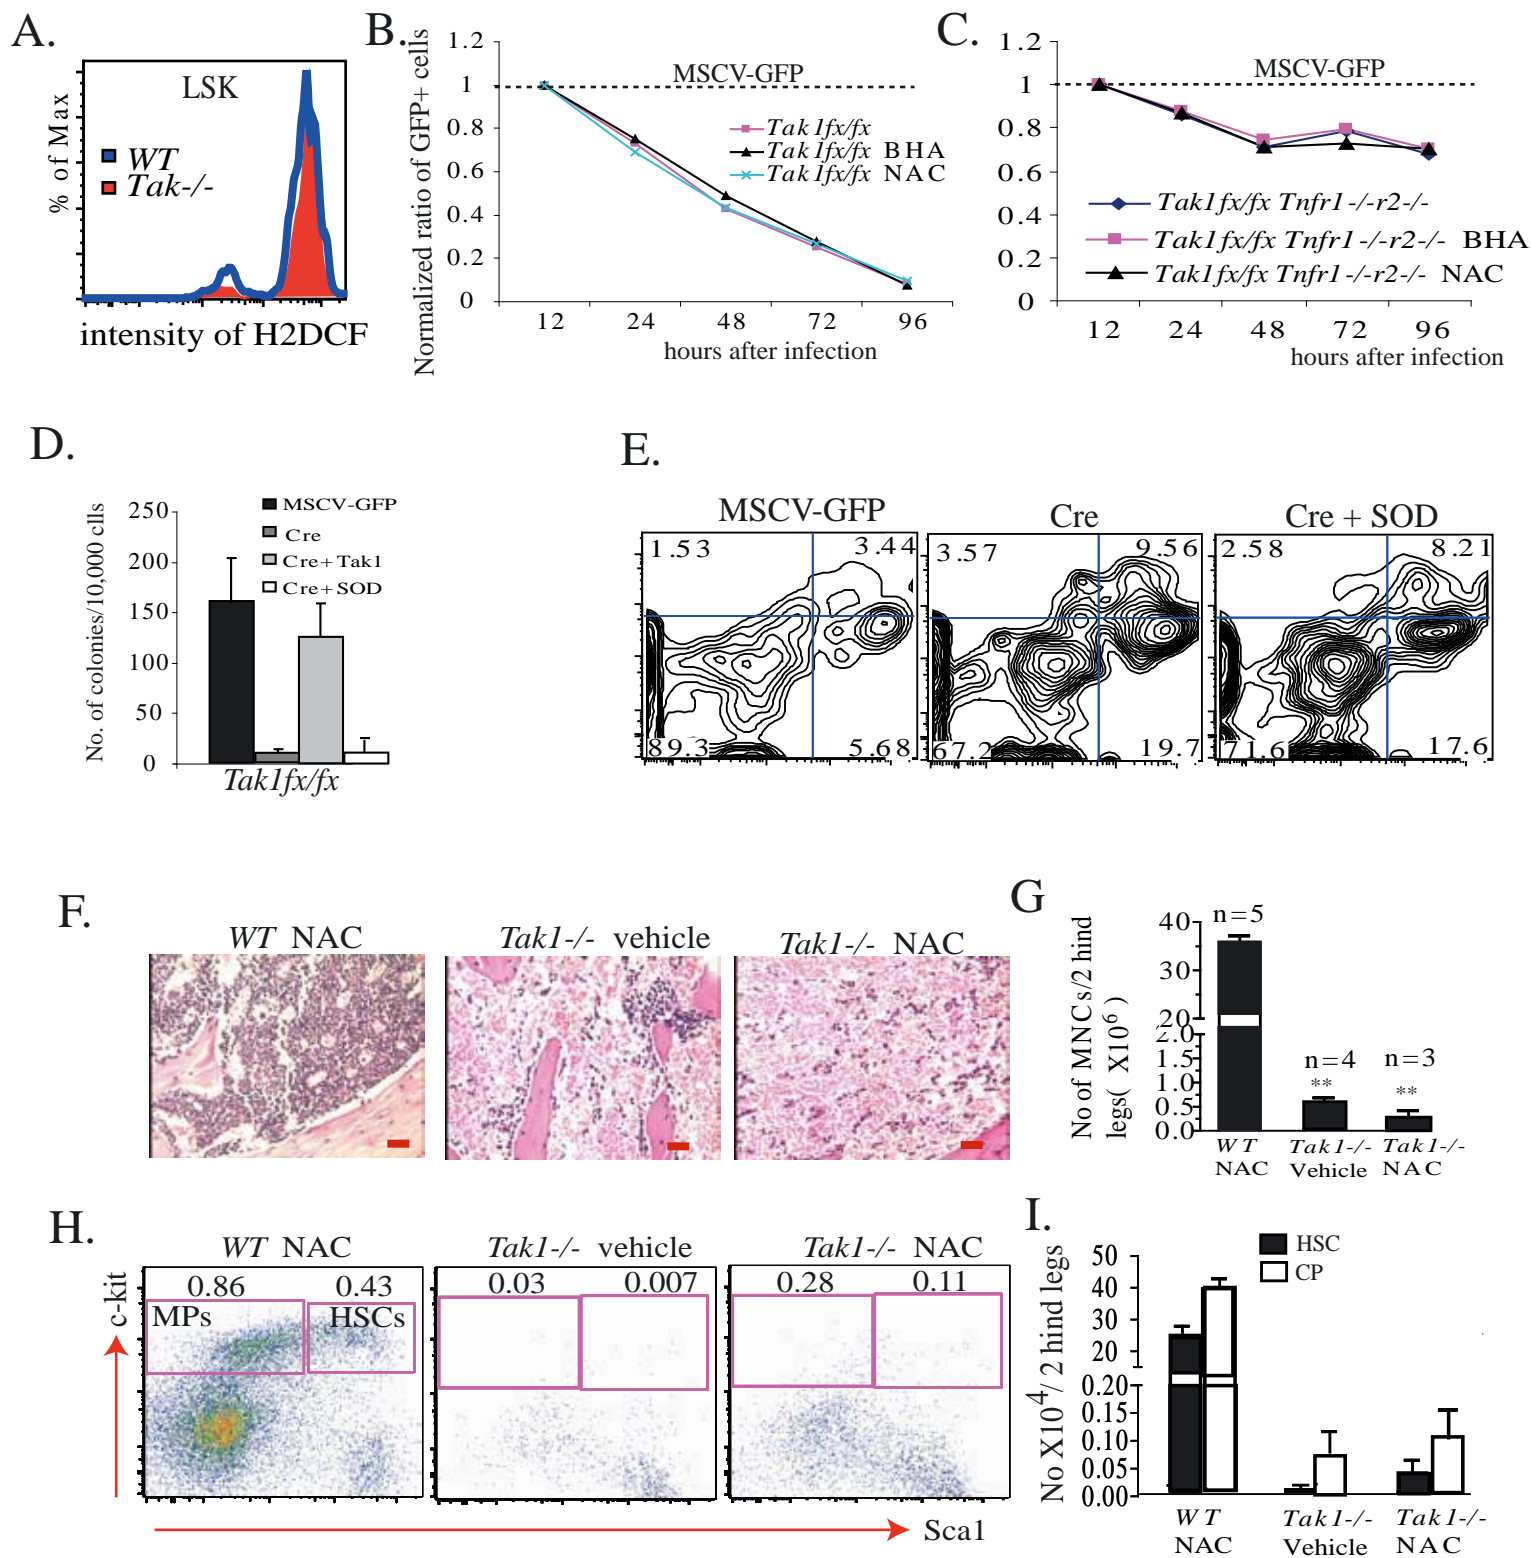

Figure S7

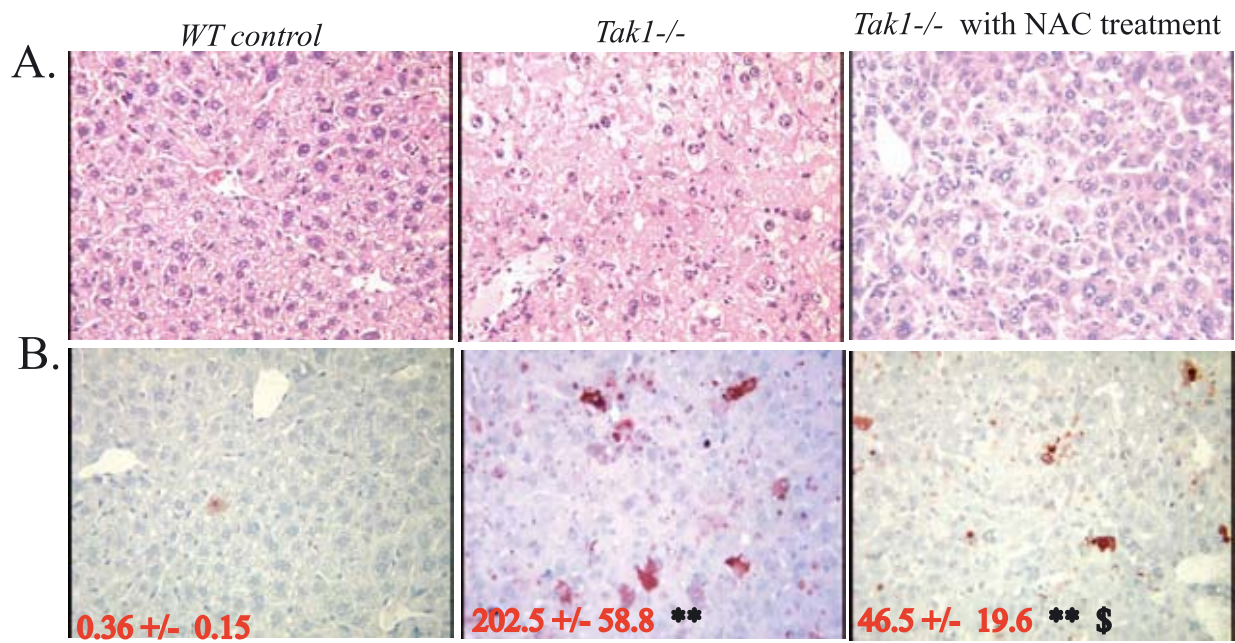

Figure S8
